# Supplementary material for: Synthesis and characterization of yellow-emitting electrophosphorescent polymers based on a fluorinated poly(arylene ether phosphine oxide) scaffold
Source: Royal Society of Chemistry journal article supplement (doi:10.1039/c2jm34421a), 2012-01-01
Supplement: c2jm34421a.pdf [file c2jm34421a.pdf]

## Supporting Information

### **Synthesis and Characterization of Yellow-Emitting Electrophosphorescent Polymers Based on A Fluorinated Poly(arylene ether phosphine oxide) Scaffold**

Shiyang Shao,<sup>†,‡</sup> Junqiao Ding,<sup>\*,†</sup> Lixiang Wang,<sup>\*,†</sup> Xiabin Jing,<sup>†</sup> and Fosong Wang<sup>†</sup>

*<sup>†</sup> State Key Laboratory of Polymer Physics and Chemistry, Changchun Institute of Applied Chemistry, Chinese Academy of Sciences, Changchun 130022, P. R. China*

*E-mail: junqiaod@ciac.jl.cn; lixiang@ciac.jl.cn*

*<sup>‡</sup> Graduate School, Chinese Academy of Sciences, Beijing 100039, P. R. China*

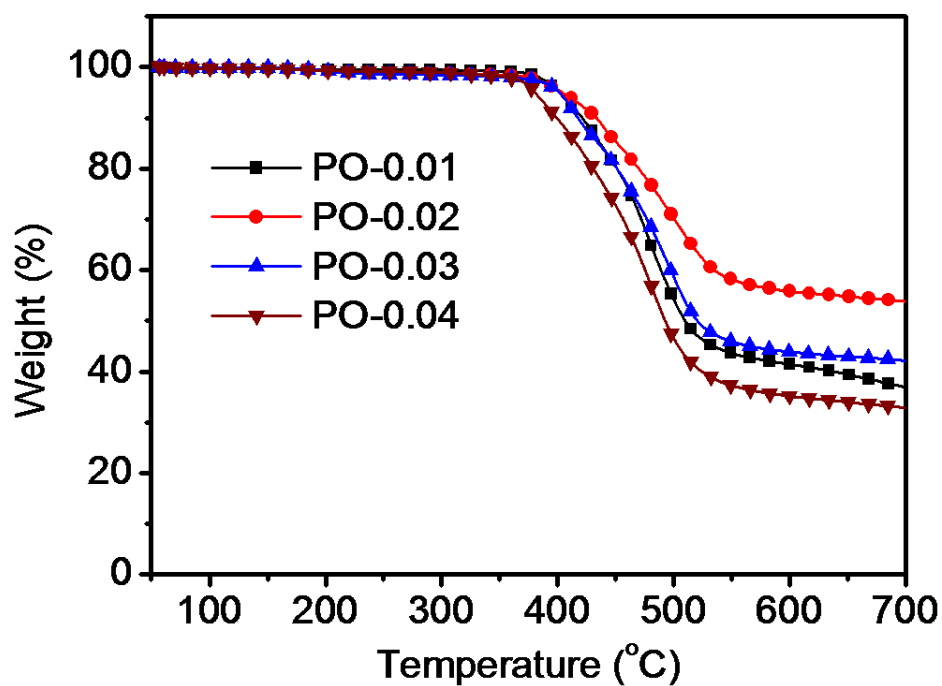

Figure S1. TGA curves of the polymers.

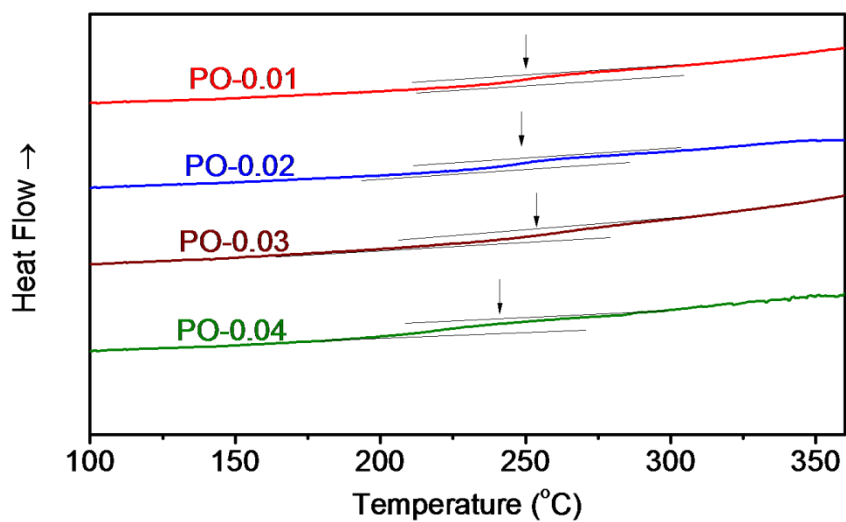

Figure S2. DSC curves of the polymers.

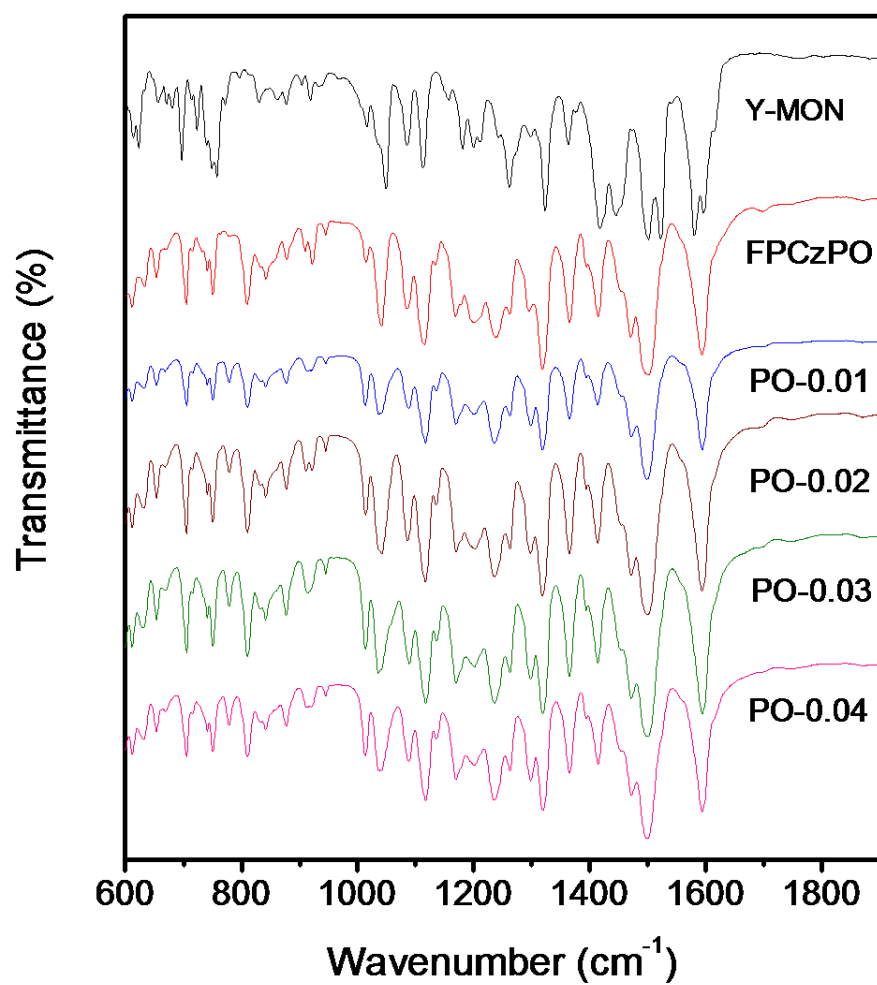

Figure S3. FT-IR spectra of Y-MON and the polymers.

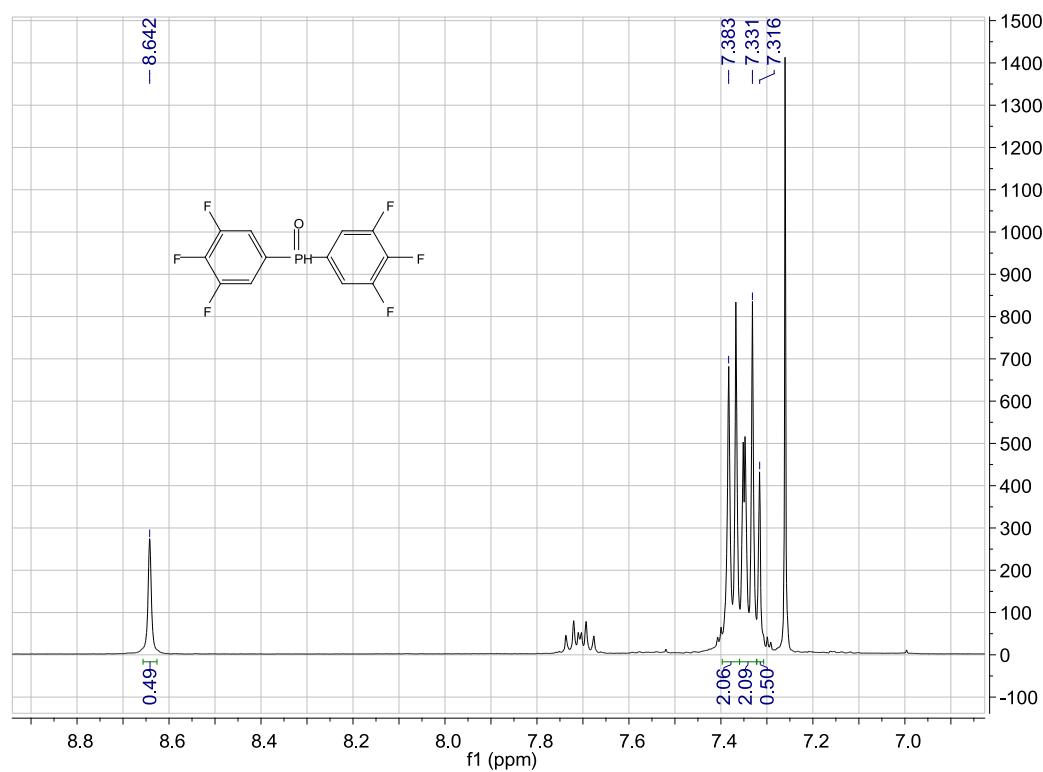

Figure S4. <sup>1</sup>H NMR spectrum of compound **6**.

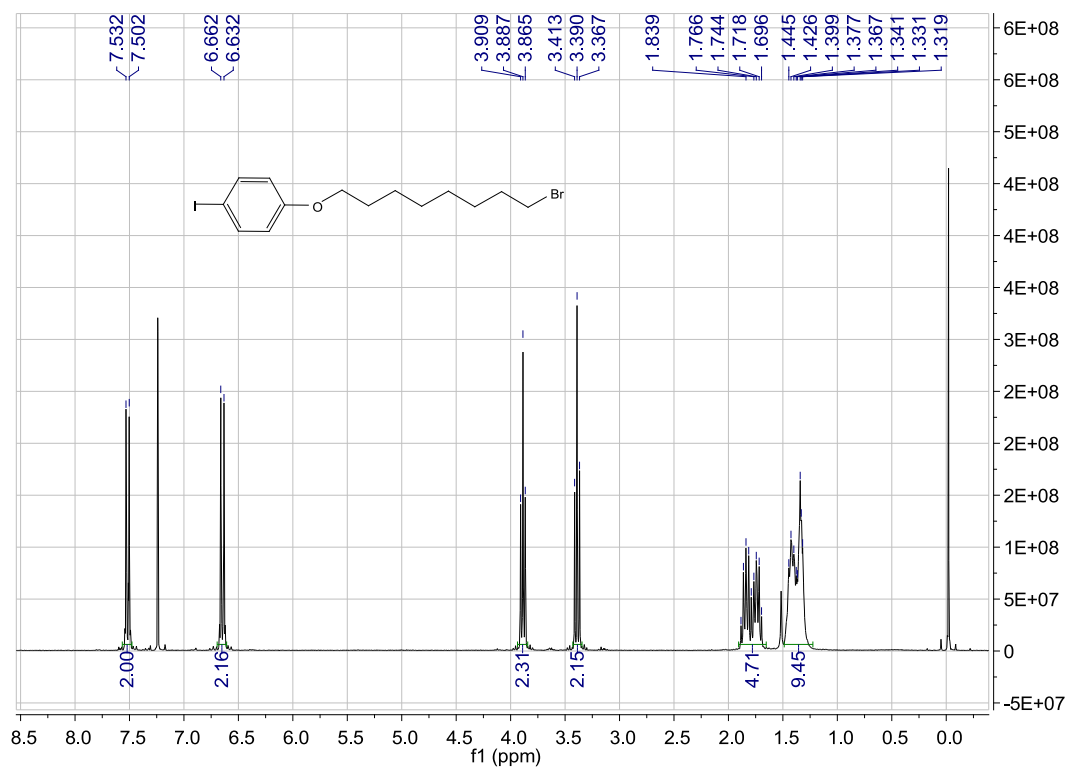

Figure S5. <sup>1</sup>H NMR spectrum of compound **8**.

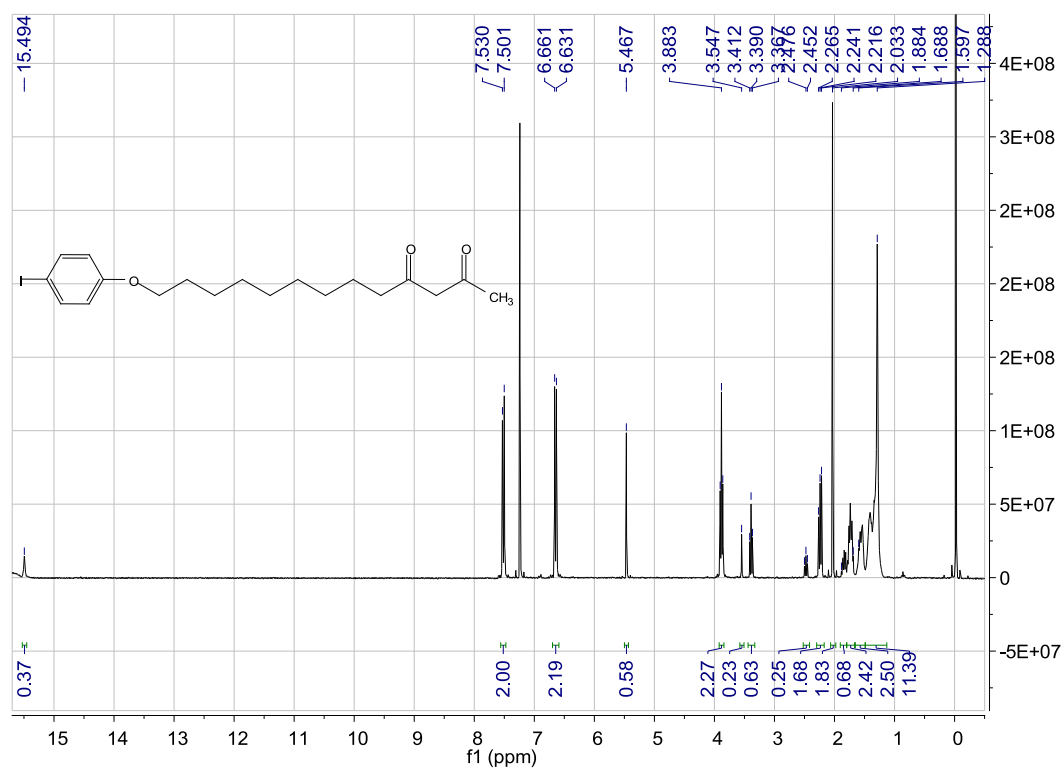

Figure S6. <sup>1</sup>H NMR spectrum of compound **9**.

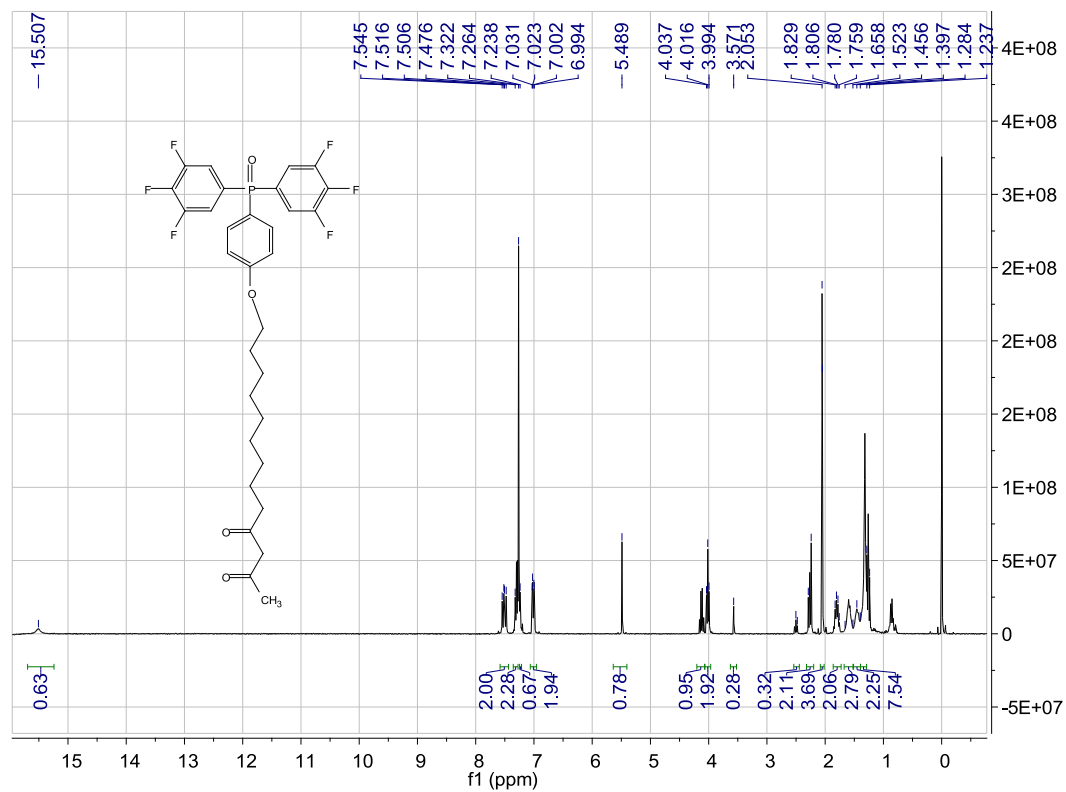

Figure S7. <sup>1</sup>H NMR spectrum of compound **10**.

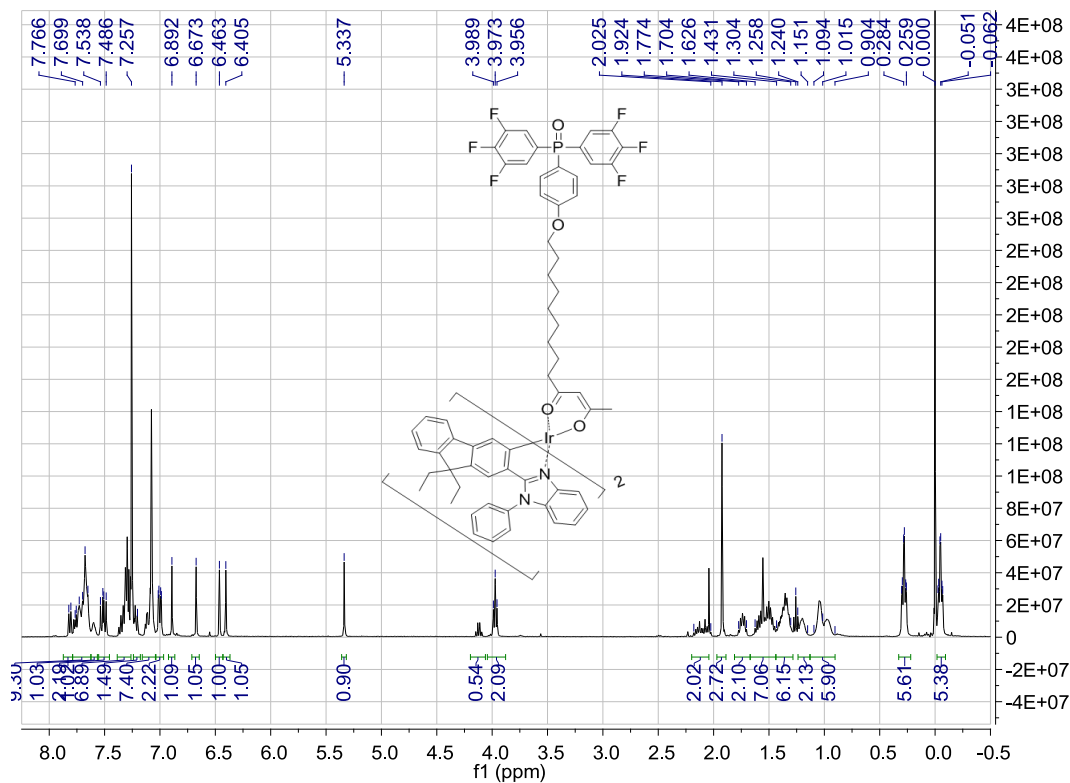

Figure S8.  $^1\text{H}$  NMR spectrum of Y-MON.
